# Supplementary material for: Controlled network structure and its correlations with physical properties of polycarboxyl octaphenylsilsesquioxanes-based inorganic–organic polymer nanocomposites
Source: Royal Society of Chemistry journal article supplement (doi:10.1039/c2ra00021k), 2012-01-01
Supplement: c2ra00021k.pdf [file c2ra00021k.pdf]

## Supporting Information

# Controlled network structure and its correlation with physical properties of polycarboxyl octaphenylsilsesquioxanes-based inorganic-organic polymer nanocomposites

Zhonggang Wang\*, Zhanbin Wang, Hao Yu, Linni Zhao and Jing Qu

*Department of Polymer Science and Materials, Dalian University of Technology, Dalian 116012,*

*People's Republic of China*

Email: zgwang@dlut.edu.cn

### Contents

**Table 1S.** LC-MS data of cleaved products of COOH<sub>5.5</sub>OPS.

**Table 2S.** LC-MS data of cleaved products of COOH<sub>7.0</sub>OPS.

**Fig. 1S** FTIR of polybromo-OPS of (a) Br<sub>6.4</sub>OPS, (b) Br<sub>9.0</sub>OPS

**Fig. 2S** FTIR of polycarboxyl-OPS of (a) COOH<sub>5.5</sub>OPS, (b) COOH<sub>7.0</sub>OPS

**Fig. 3S** LC spectrum of cleaved products of COOH<sub>5.5</sub>OPS

**Fig. 4S** LC spectrum of cleaved products of COOH<sub>7.0</sub>OPS

**Fig. 5S** DSC curves of epoxy resins with different content of polycarboxyl-OPS

**Table 1S.** LC-MS data of cleaved products of COOH<sub>5,5</sub>OPS

| LC/MS Peak/(min)           | Assignment                    |                                                                                      |         |
|----------------------------|-------------------------------|--------------------------------------------------------------------------------------|---------|
|                            | Cleaved products              | Structure                                                                            | ( mol%) |
| 7.59                       | Phenol                        | 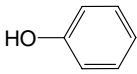   | 30.8    |
| 13.53                      | Hydroxybenzoic acid           |    | 42.9    |
|                            |                               |    |         |
| 16.02                      | Hydroxybenzoic acid           |    | 4.3     |
| 22.82, 24.23, 25.94, 27.85 | Monobromo hydroxybenzoic acid |   | 20.8    |
| 33.25, 33.78               | Dibromo hydroxybenzoic acid   |  | 1.2     |

**Table 2S.** LC-MS data of cleaved products of COOH<sub>7,0</sub>OPS

| Assignment                 |                               |                                                                                      |         |
|----------------------------|-------------------------------|--------------------------------------------------------------------------------------|---------|
| LC/MS Peak/(min)           | Cleaved products              | Structure                                                                            | ( mol%) |
| 7.64                       | Phenol                        | 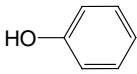   | 10.2    |
| 13.71                      | Hydroxybenzoic acid           |    | 47.4    |
|                            |                               |    |         |
| 16.33                      | Hydroxybenzoic acid           |    | 16.9    |
| 21.31, 24.08, 24.35, 25.99 | Monobromo hydroxybenzoic acid |   | 20.7    |
| 31.74, 32.31 35.36, 36.52  | Dibromo hydroxybenzoic acid   |  | 4.8     |

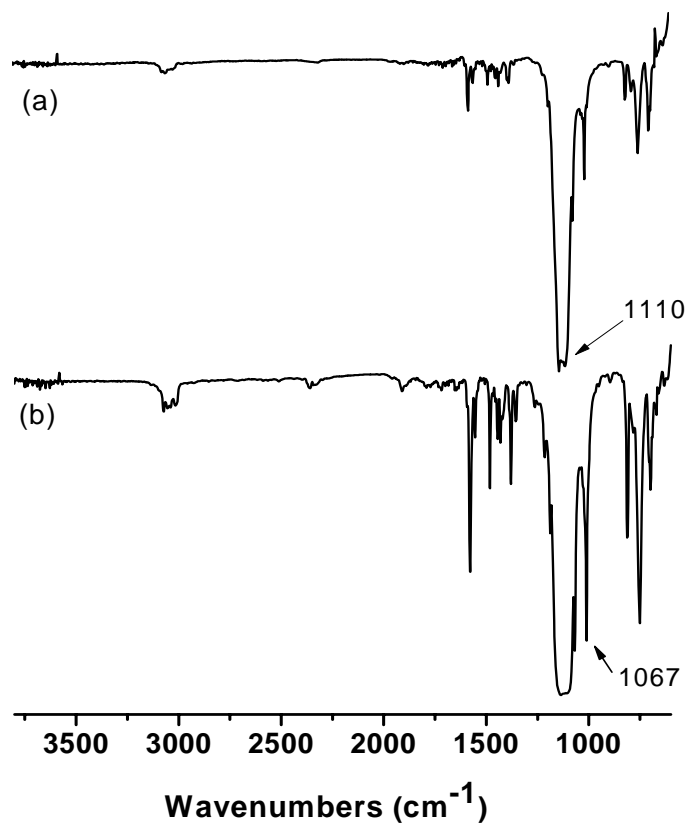

**Fig. 1S** FTIR of polybromo-OPS of (a) Br<sub>6.4</sub>OPS, (b) Br<sub>9.0</sub>OPS

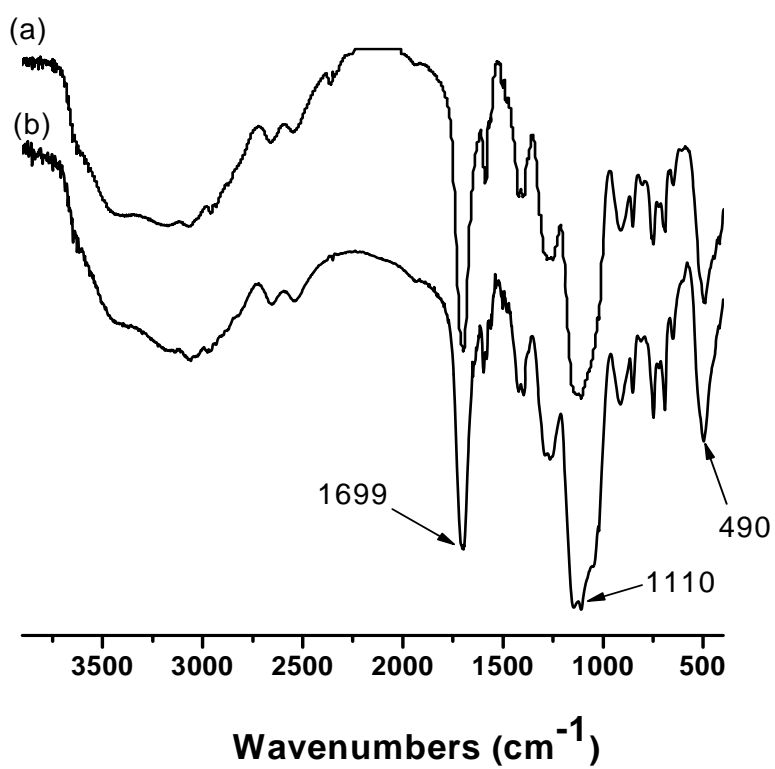

**Fig. 2S** FTIR of polycarboxyl-OPS of (a) COOH<sub>5.5</sub>OPS, (b) COOH<sub>7.0</sub>OPS

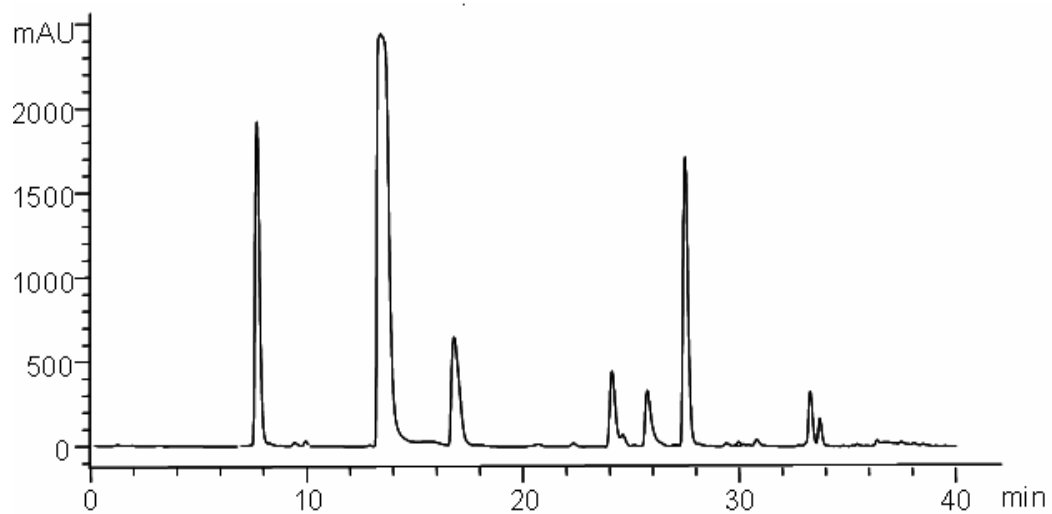

**Fig. 3S** LC spectrum of cleaved products of COOH<sub>5,5</sub>OPS

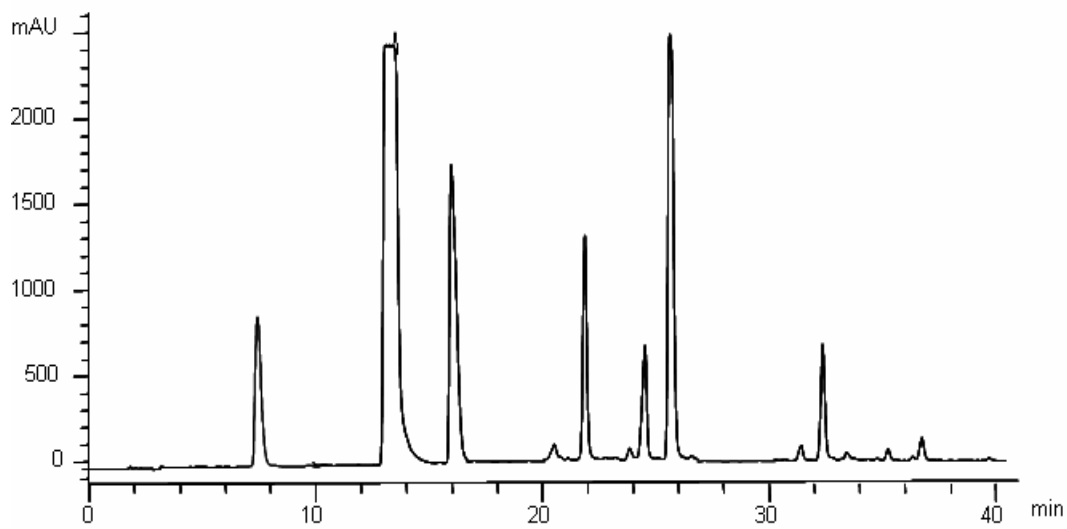

**Fig. 4S** LC spectrum of cleaved products of COOH<sub>5,5</sub>OPS

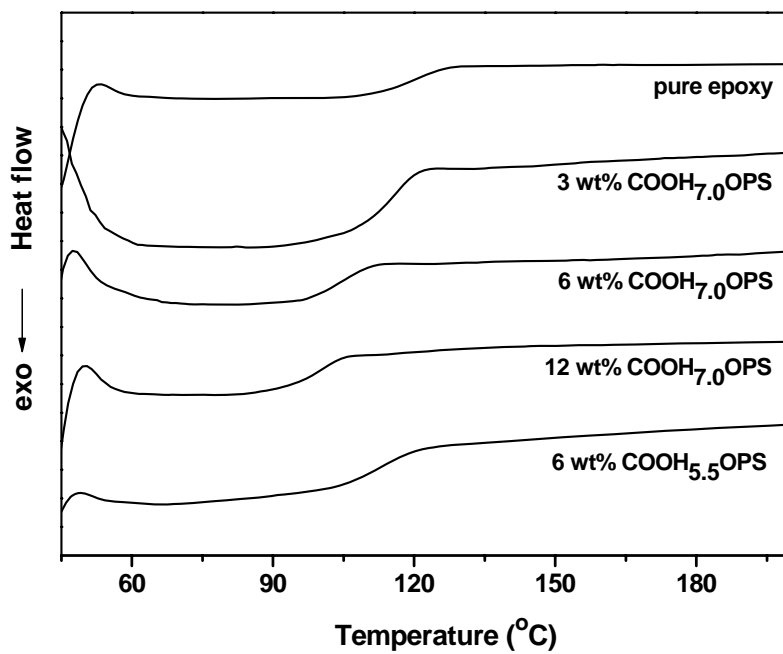

**Fig. 5S** DSC curves of epoxy resins with different content of polycarboxyl-OPS
